# Supplementary material
Source: MDPI journal article supplement (https://www.mdpi.com/2073-4395/7/3/48)
Supplement: s1 [file s1]

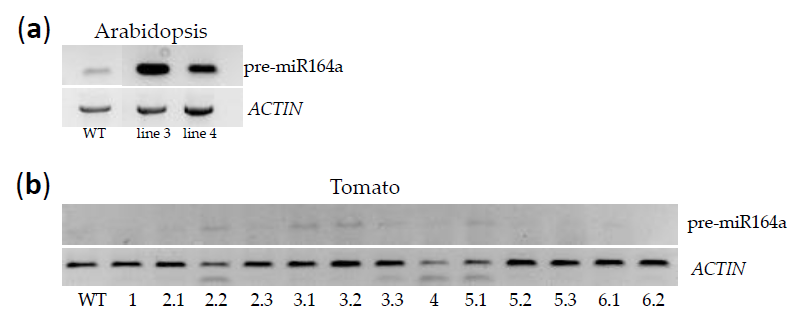


**Figure S1.** Expression analysis of pre-miR164a in Arabidopsis and tomato 164-OE lines. (**a**) RT-PCR of pre-miR164 in miR164-OE Arabidopsis plants. Leaf tissue of the different lines was used. (**b**) RT-PCR of pre-miR164 in miR164-OE tomato plants. Flower tissue of the different plants for each line was used. In tomato, the number indicates the 164-OE line followed by a point, and plant number, which was randomly selected. *ACTIN* was used as a constitutive control.


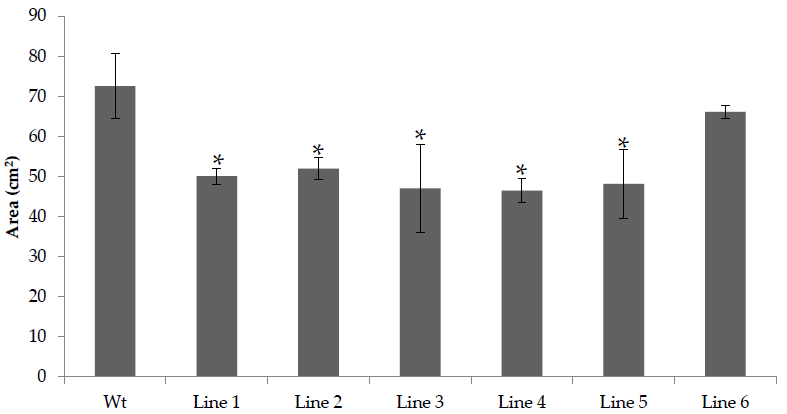


**Figure S2.** Plant area of different 164-OE tomato lines. The areas of two plants of different lines were measured using ImageJ and graphed. The means and LSD intervals at a confidence level of 95% were plotted. The * indicates that there is a statistically significant difference.

**Table S1**. Oligonucleotides used to amplify a fragment of different miR164 target genes.

| **Genes** | **Oligonucleotides** |
| --- | --- |
| *CUC 1* | Fw CCATTTGAGCAGAGAAAGCGA |
| Rv CAGACAAACTTTACAGAGAACCCA |
| Solyc07g066330.2.1 (*NAC1*) | Fw AAGTTGTTCATCTCTACCACCA |
| Rv GCTAGTTTCAGAACTTCCTTCAC |
| Solyc07g062840.2.1 (*GOBLET*) | Fw GTCTAACTTTCGATCCAACTTCTG |
| Rv CAATACCACTAAAGCTGCCAC |
| Solyc063g115850.2.1 (*NAM2*) | Fw CCATTGACAGATTCATCGCC |
| Rv AGTGTTCCTATCAGTGCTTATACC |
| Solyc06g069710.2.1 (*NAM3*) | Fw TTTCCCTCTTCTGTCAAATCCA |
| Rv ACCCTGTAATCCAACCATACC |
| *ACTIN* tomato | Fw CCTCAGCACATTCCAGCAG |
| Rv CCACCAAACTTCTCCATCCC |
| *ACTIN8* Arabidopsis | Fw TGCCTGGACCTGCTTCATCATACT |
| Rv TGCCTGGACCTGCTTCATCATACT |
| *BAR* | Fw TCTGCACCATCGTCAACCACTACA |
| Rv GCAGCCCGATGACAGCGACCAC |

Fw, forward oligonucleotide; Rv, reverse oligonucleotide.
